# Supplementary material
Source: PubMed Central journal article supplement (PMC6648523)

## Supporting Information

### **Combination of Epigallocatechin-3-gallate and Silibinin: A Novel Approach for Targeting Both Tumor and Endothelial Cells**

Somaye Mirzaaghaei<sup>†</sup>, Ali M. Foroughmand<sup>\*\*†</sup>, Ghasem Saki<sup>‡</sup>, Mohammad Shafiei<sup>†</sup>

<sup>†</sup> Department of Genetics, Faculty of Science, Shahid Chamran University of Ahvaz, Golestan Blvd, Ahvaz-Iran.

<sup>‡</sup> Department of Anatomical Sciences, Faculty of Medicine, Ahvaz Jundishapur University of Medical Sciences, Ahvaz-Iran.

\*Corresponding author:

Department of Genetics, Faculty of Science, Shahid Chamran University of Ahvaz, Golestan Blvd, Ahvaz-Iran.

Tel: +986133367008

Fax: +986133332618

E-mail address: [aliforough12@yahoo.com](mailto:aliforough12@yahoo.com)

## Supporting information

**Figure S1.** Decreased cell viability of HUVEC, A549 and HDF in a dose dependent manner in response to EGCG and Silibinin. Relative cell viability of, A) HUVEC, B) A549, and C)HDF cells, in response to silibinin (100, 125  $\mu$ M) or EGCG (100, 125  $\mu$ g/mL), in compare with control, in 24 hrs. Values represent mean  $\pm$  SEM of at least three triplicate replicates (Unequal letters indicate significant difference with  $P < 0.05$ ).

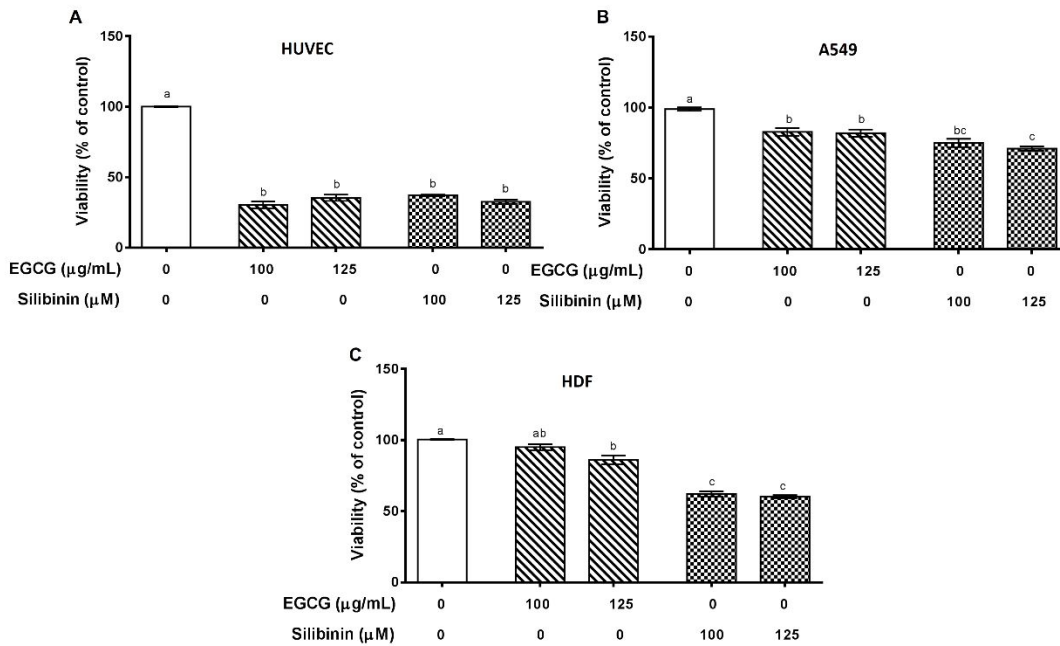

Supplement: ao9b00224_si_001.pdf [file ao9b00224_si_001.pdf]
